# Supplementary material
Source: PubMed Central journal article supplement (PMC3389271)

Fig1A  $M_r$  (K)

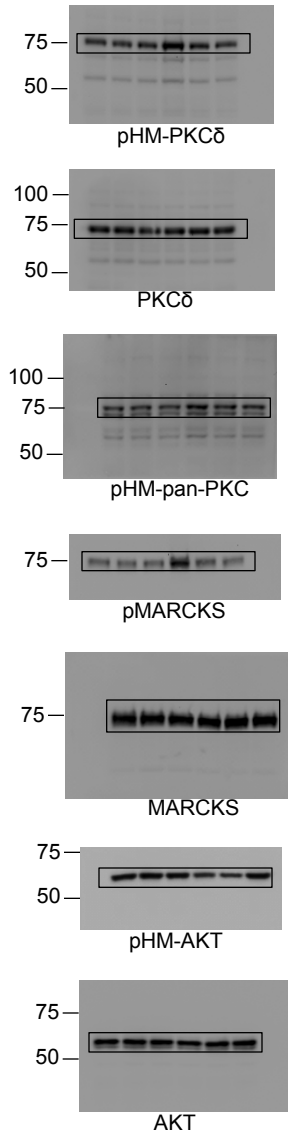

Fig1B  $M_r$  (K)

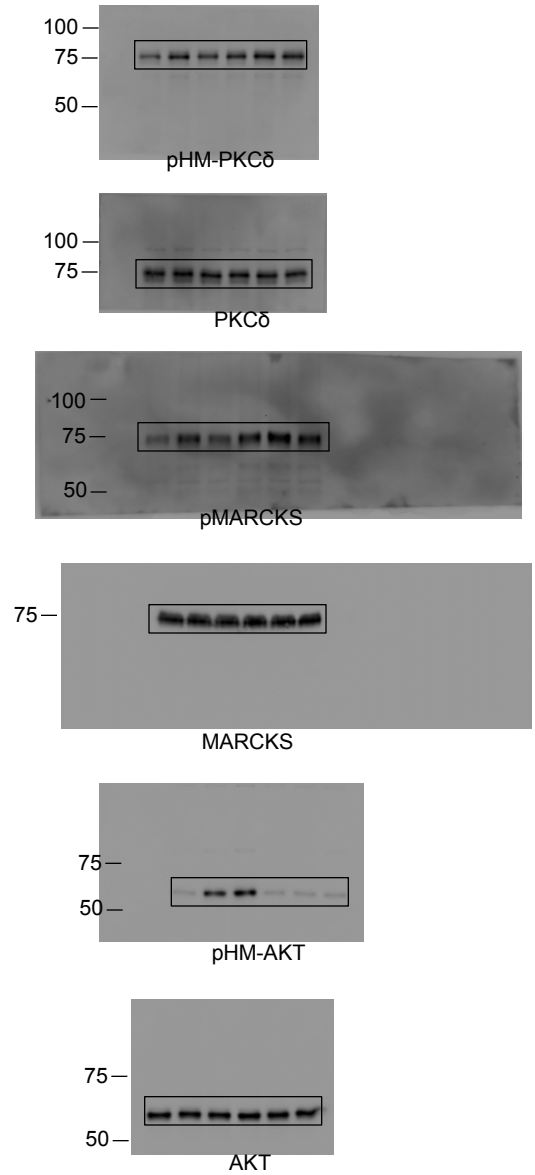

Fig1C  $M_r$  (K)

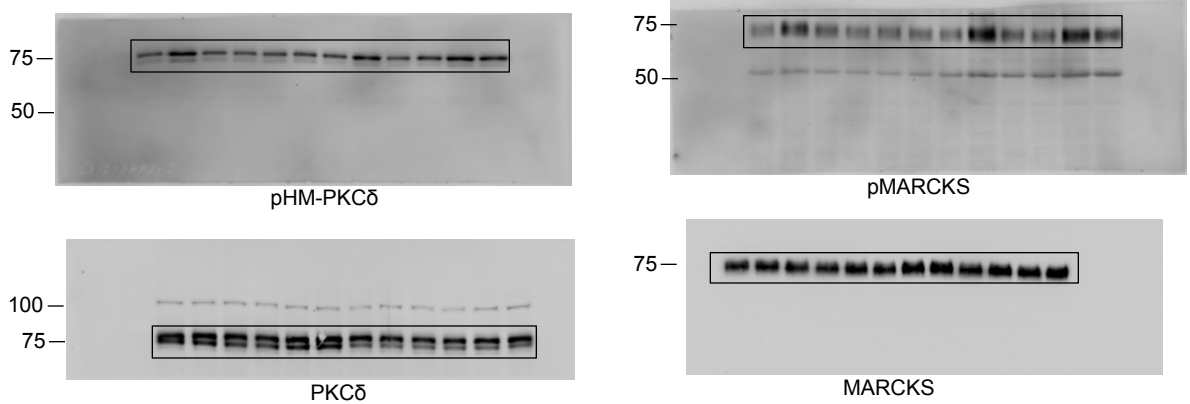

Fig2A  $M_r$  (K)

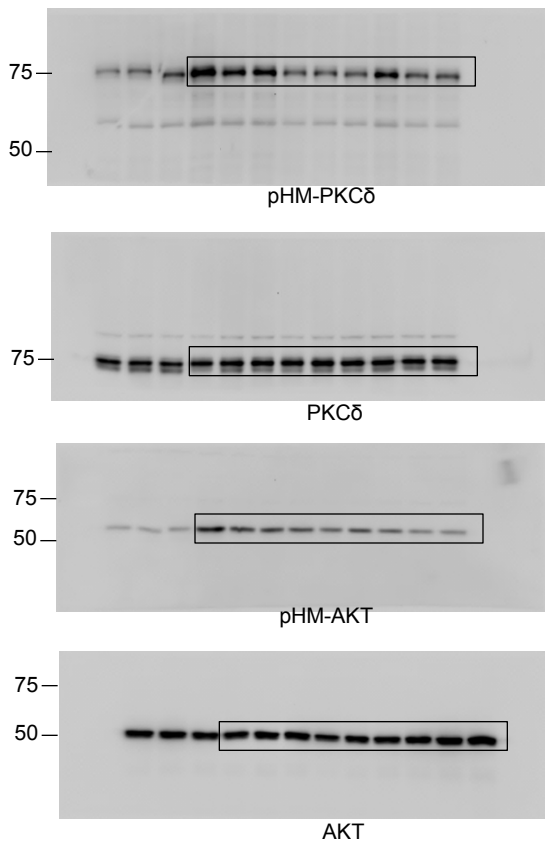

Fig2C  $M_r$  (K)

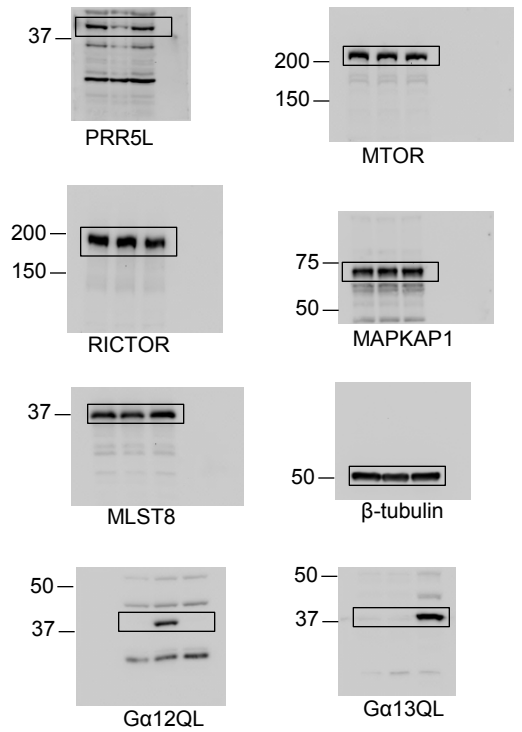

Fig2B  $M_r$  (K)

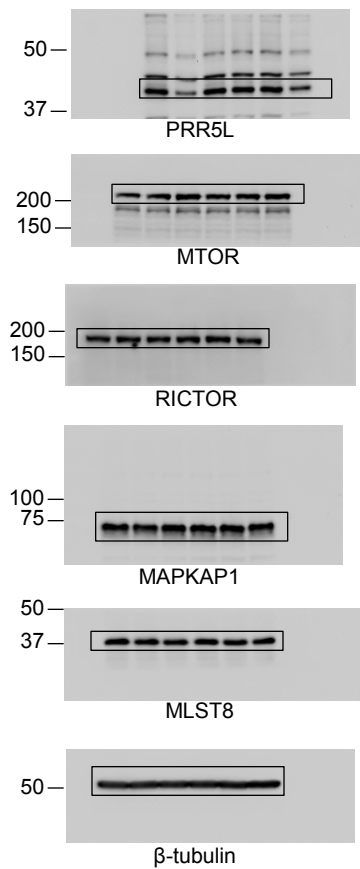

Fig2E  $M_r$  (K)

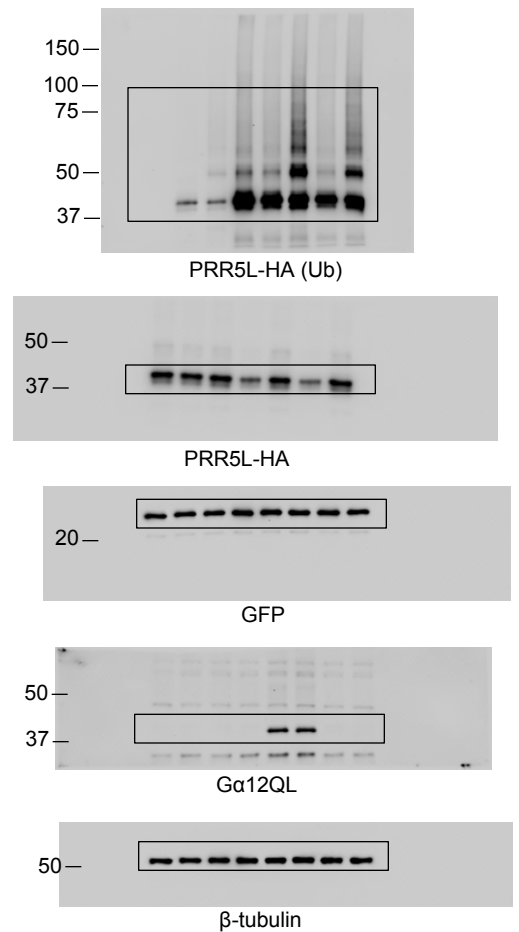

Fig3A

$M_r$  (K)

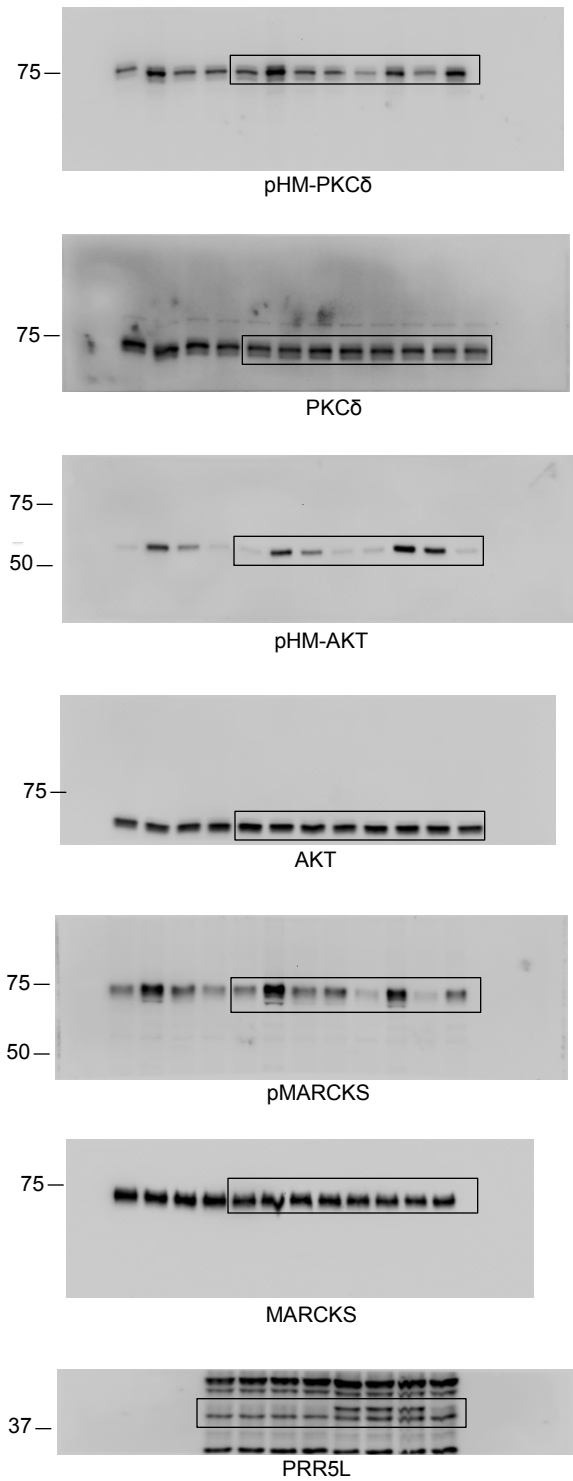

Fig3B

$M_r$  (K)

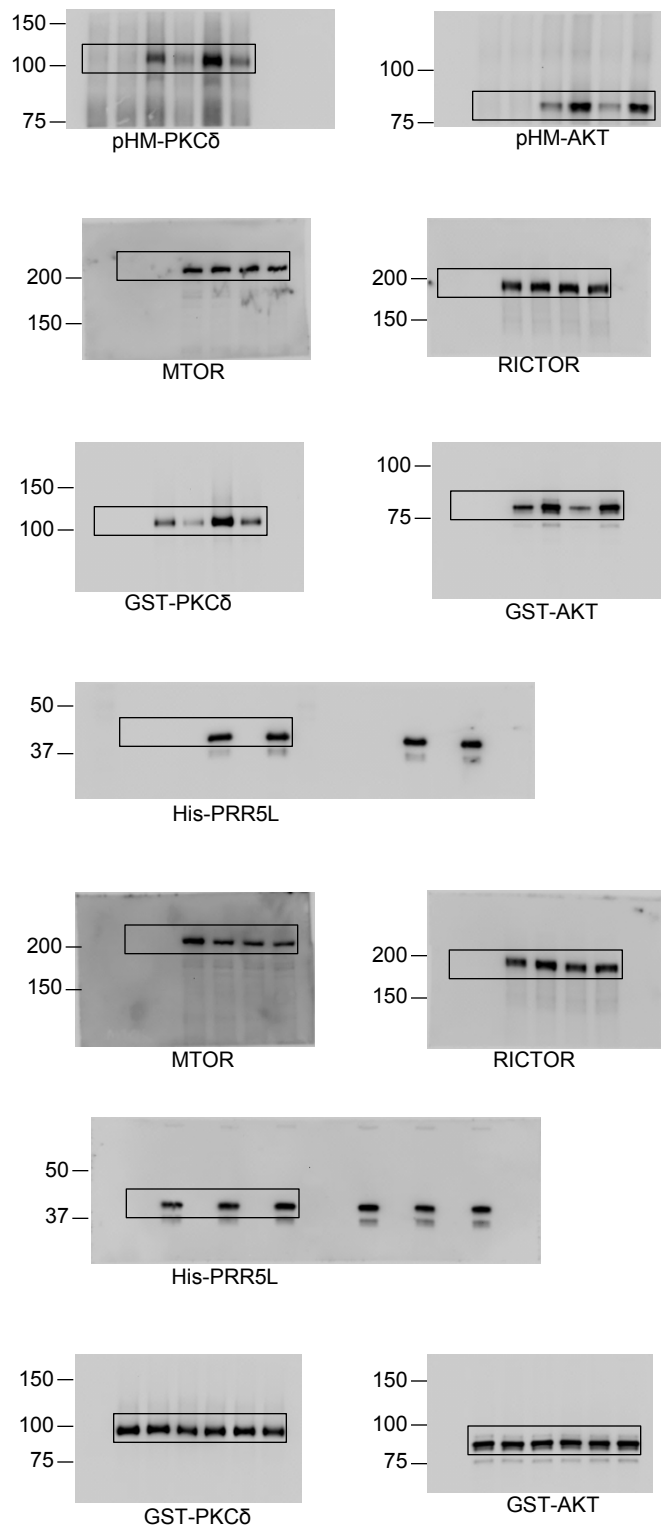

Fig4A  $M_r$  (K)

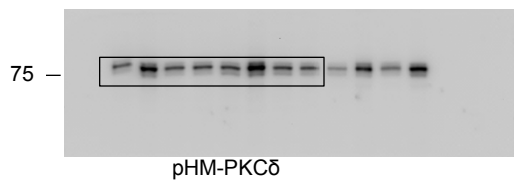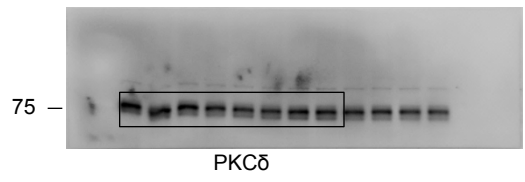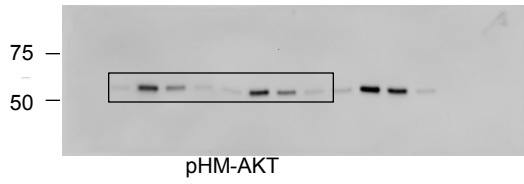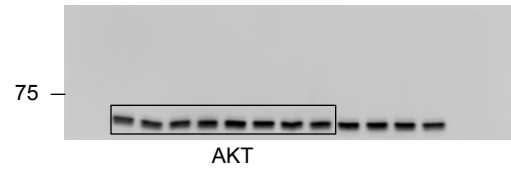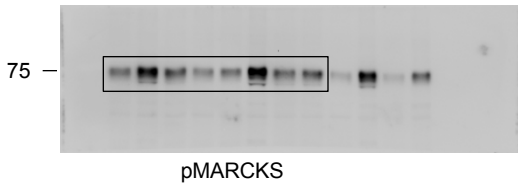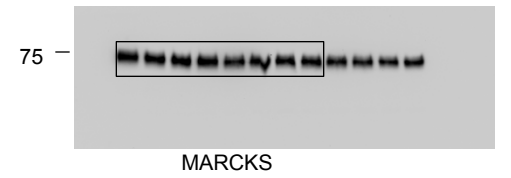

Fig4B  $M_r$  (K)

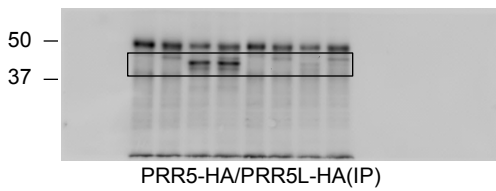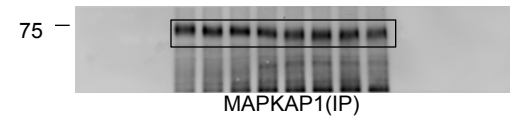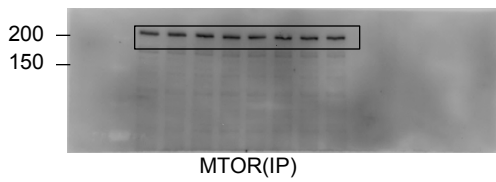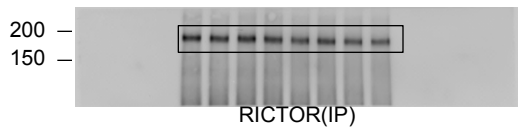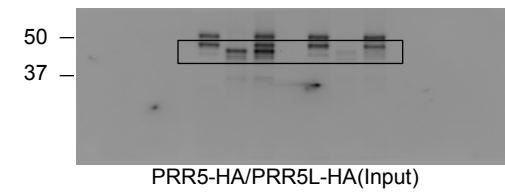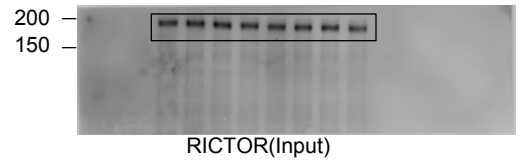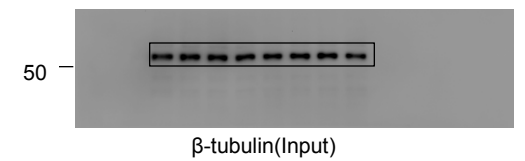

Fig4C  $M_r$  (K)

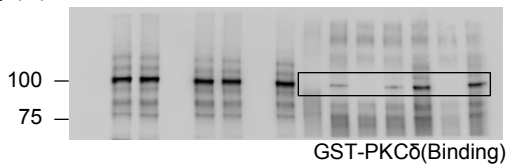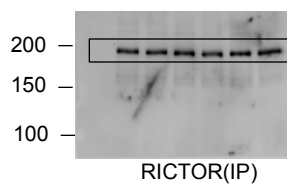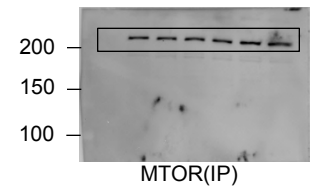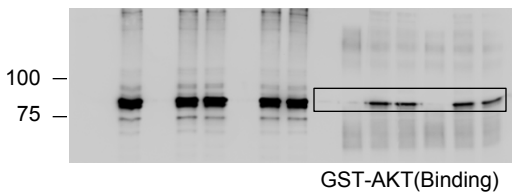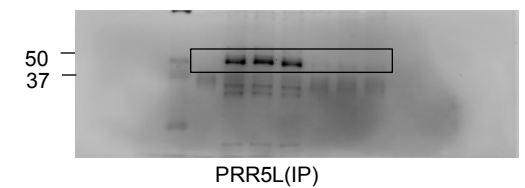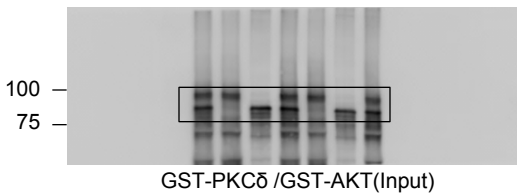

Fig5C  $M_r$  (K)

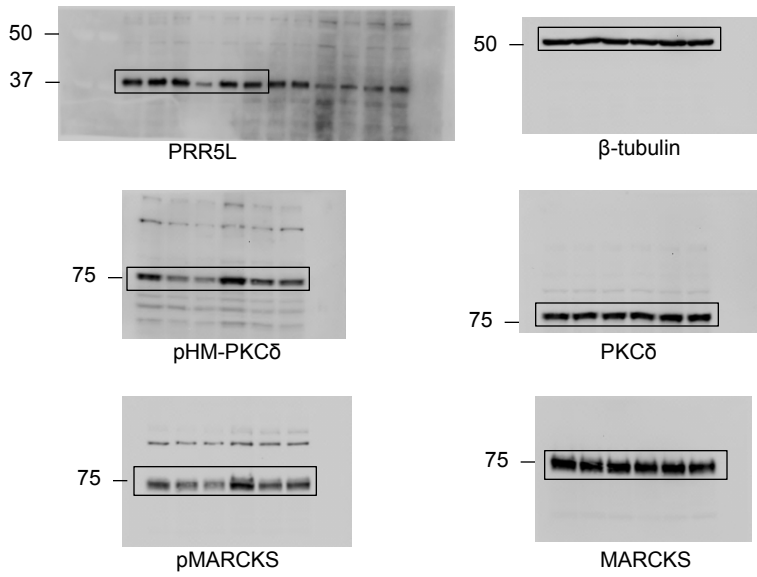

Fig5E  $M_r$  (K)

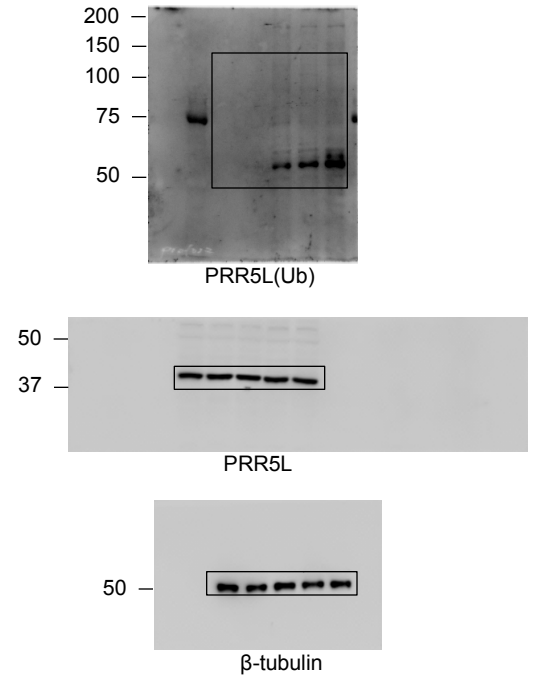

Fig5D  $M_r$  (K)

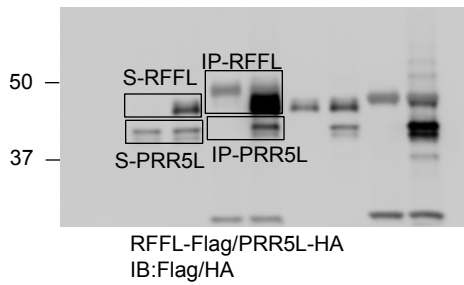

Fig5F  $M_r$  (K)

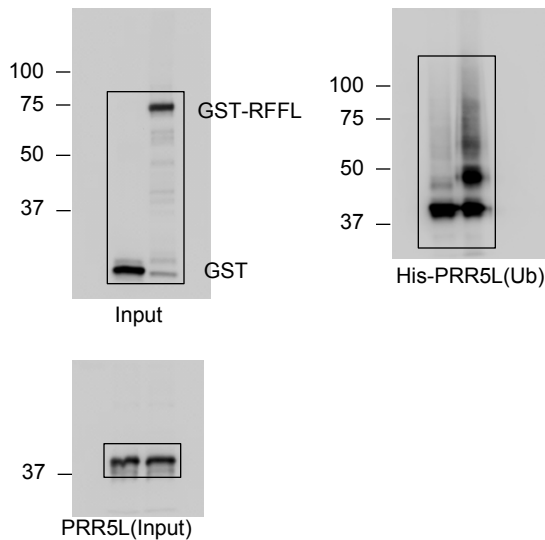

Fig5G  $M_r$  (K)

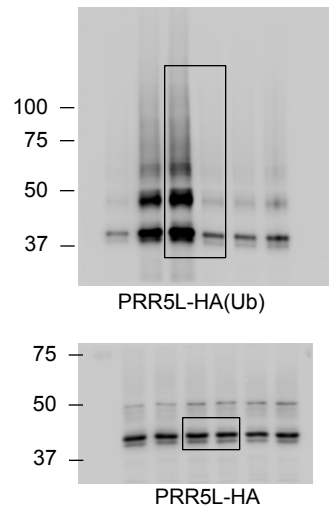

Fig6B  $M_r$  (K)

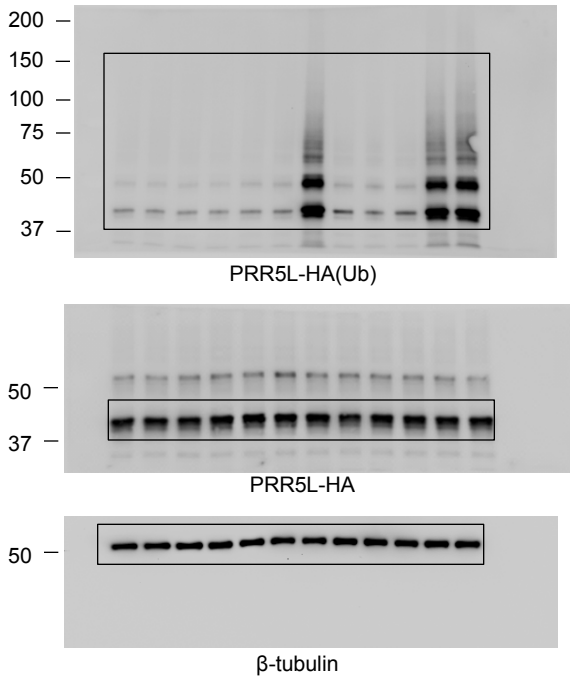

Fig6C  $M_r$  (K)

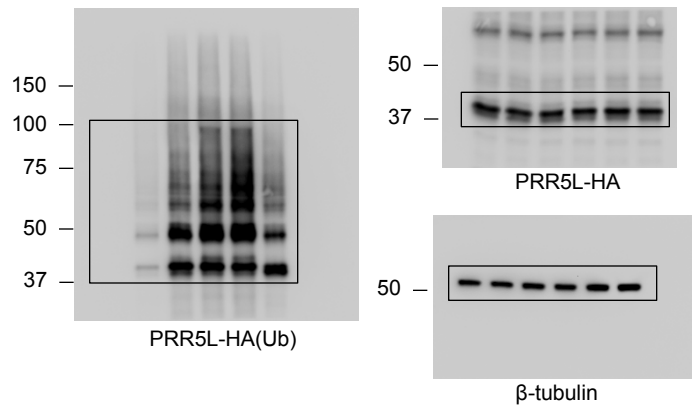

Fig6D  $M_r$  (K)

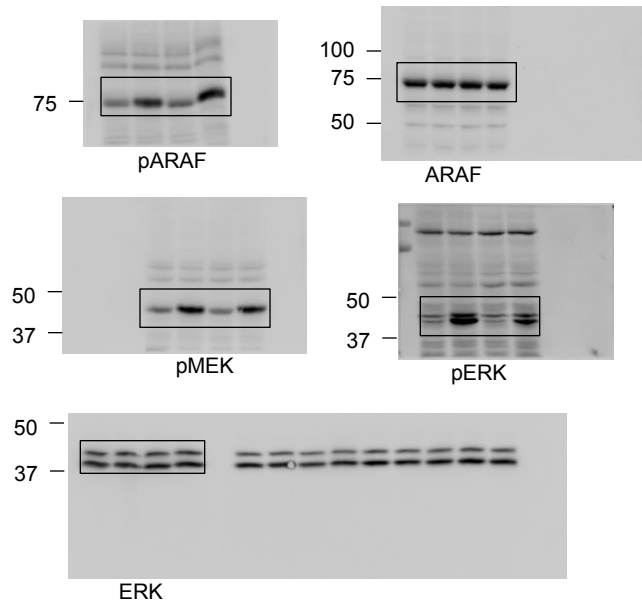

Fig6E  $M_r$  (K)

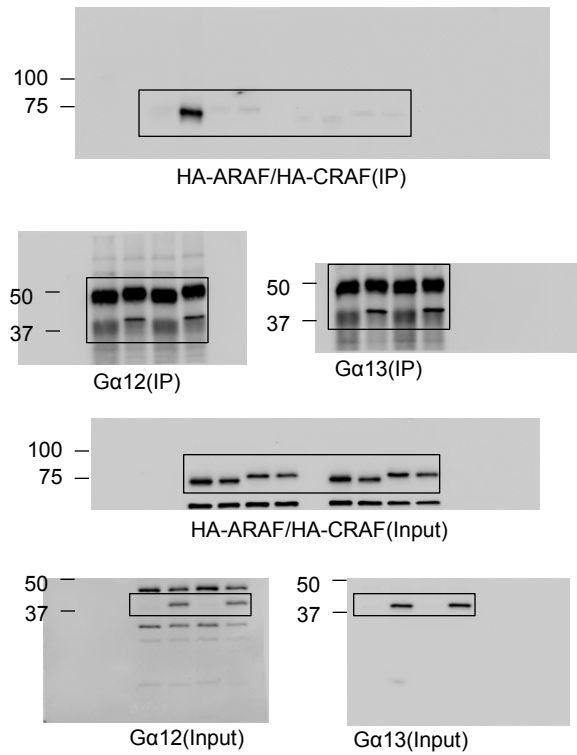

Fig6F  $M_r$  (K)

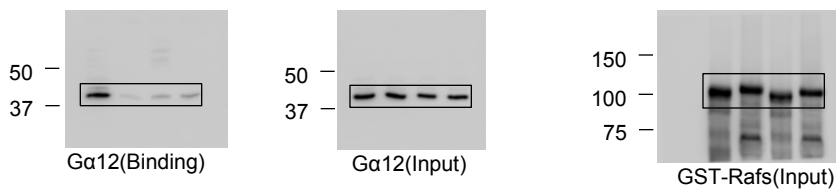

Fig7I  $M_r$  (K)

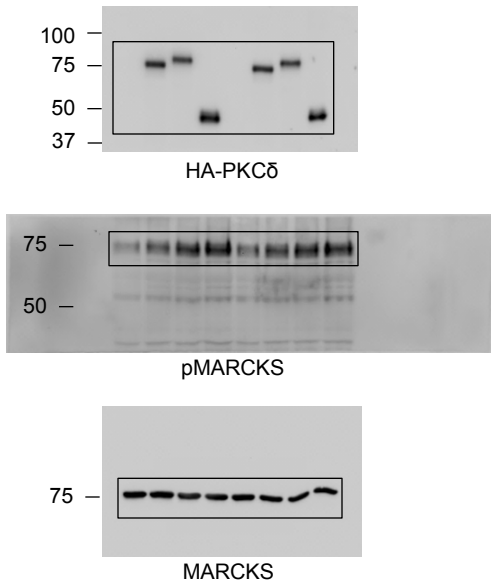

Fig8D  $M_r$  (K)

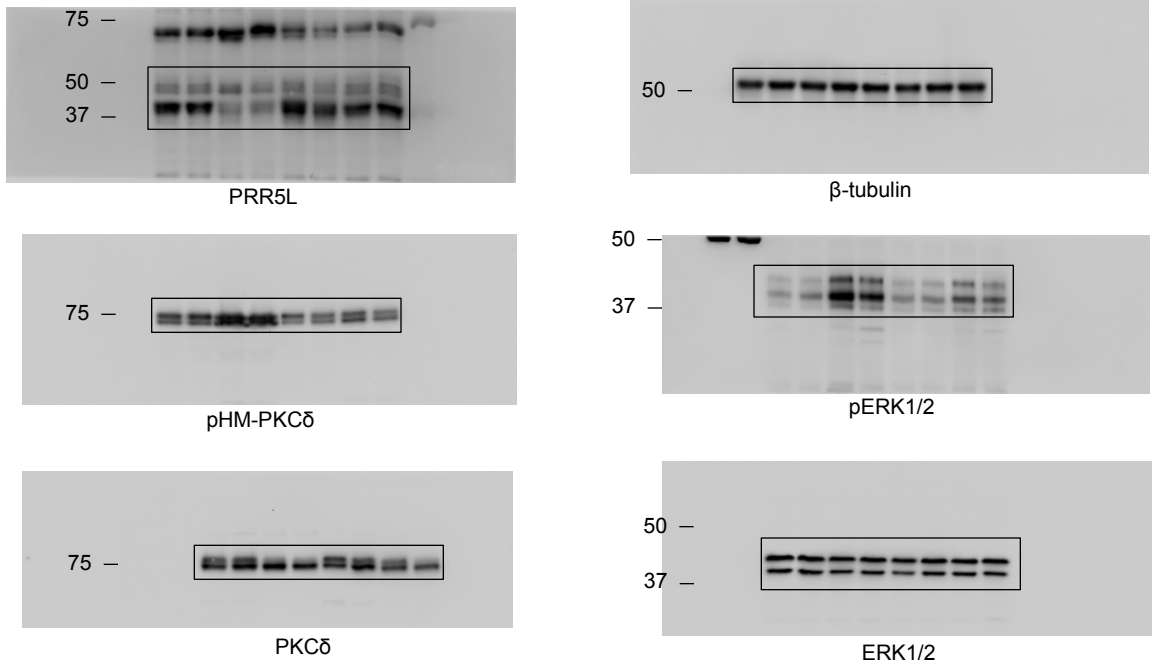

Supplement: NIHMS371526-supplement-4.pdf [file NIHMS371526-supplement-4.pdf]
